# Supplementary material
Source: PubMed Central journal article supplement (PMC6233777)
Supplement: jamaoncol-4-1335-s001.pdf [file jamaoncol-4-1335-s001.pdf]

## Supplementary Online Content

Luen SJ, Asher R, Lee CK, et al. Association of somatic driver alterations with prognosis in postmenopausal, hormone receptor–positive, *HER2*-negative early breast cancer: a secondary analysis of the BIG 1-98 randomized clinical trial. *JAMA Oncol*. Published online June 14, 2018. doi:10.1001/jamaoncol.2018.1778

**eTable 1.** DNA Sequencing Target Gene Panel

**eTable 2.** Characteristics of the Entire Eligible BIG 1-98 Cohort and of the Analysis Population

**eTable 3.** Somatic Driver Alterations and Weighted Frequencies

**eTable 4.** Association With Clinicopathologic Characteristics

**eTable 5.** Pairwise Analysis – q Values

**eTable 6.** Prognostic Associations by Affected *PIK3CA* Protein Domain

**eTable 7.** Predictive Associations by Affected *PIK3CA* Protein Domain

**eTable 8.** Predictive Associations by Affected *PIK3CA* Mutation Hotspot

**eTable 9.** Treatment Interaction With *PIK3CA* Mutation Status in a Multivariate Cox Proportional Hazards Model

**eFigure 1.** Coexistent Alterations in Tumors With a *PIK3CA* Mutation

**eFigure 2.** *PIK3CA* Mutations and Affected Protein Domains

**eFigure 3.** Coalterations by Affected *PIK3CA* Protein Domain

**eFigure 4.** Coalteration Frequencies by *PIK3CA* Genotype

**eFigure 5.** Associations With Ki-67 (%) Levels

**eFigure 6.** Association of Pathological Characteristics by Affected *PIK3CA* Protein Domain

**eFigure 7.** Pairwise Analysis

**eFigure 8.** Prognostic Association of Frequent Amplicons With DRFI

**eFigure 9.** STEPP Analysis by *PIK3CA* Mutation Status

This supplementary material has been provided by the authors to give readers additional information about their work.

**eTable 1. DNA Sequencing Target Gene Panel<sup>a</sup>**

|          |         |         |        |         |         |          |        |
|----------|---------|---------|--------|---------|---------|----------|--------|
| ABL1     | CCND1   | EPHA3   | GATA2  | MAP3K1  | NTRK3   | REL      | VHL    |
| AKT1     | CCND2   | EPHA5   | GATA3  | MAP3K13 | NUP93   | RET      | WISP3  |
| AKT2     | CCND3   | EPHB1   | GNA11  | MCL1    | PAK3    | RICTOR   | WT1    |
| AKT3     | CCNE1   | ERBB2   | GNA13  | MDM2    | PAK7    | RNF43    | XPO1   |
| ALK      | CD79A   | ERBB3   | GNAQ   | MDM4    | PALB2   | RPA1     | XRCC3  |
| ALOX12B  | CD79B   | ERBB4   | GNAS   | MED12   | PARP1   | RPTOR    | ZNF217 |
| APC      | CDC73   | ERG     | GPR124 | MEF2B   | PARP2   | RUNX1    | ZNF703 |
| APCDD1   | CDH1    | ESR1    | GRIN2A | MEN1    | PARP3   | RUNX1T1  |        |
| AR       | CDK12   | EZH2    | GSK3B  | MET     | PARP4   | SETD2    |        |
| ARAF     | CDK4    | FAM123B | HGF    | MITF    | PAX5    | SF3B1    |        |
| ARFRP1   | CDK6    | FAM46C  | HLA-A  | MLH1    | PBRM1   | SH2B3    |        |
| ARID1A   | CDK8    | FANCA   | HRAS   | MLL     | PDGFRA  | SMAD2    |        |
| ARID2    | CDKN1B  | FANCC   | IDH1   | MLL2    | PDGFRB  | SMAD4    |        |
| ASXL1    | CDKN2A  | FANCD2  | IDH2   | MPL     | PK1     | SMARCA4  |        |
| ATM      | CDKN2B  | FANCE   | IGF1   | MRE11A  | PIK3C2G | SMARCB1  |        |
| ATR      | CDKN2C  | FANCF   | IGF1R  | MSH2    | PIK3C3  | SMARCD1  |        |
| ATRX     | CEBPA   | FANCG   | IGF2   | MSH6    | PIK3CA  | SMO      |        |
| AURKA    | CHEK1   | FANCI   | IKBKE  | MTOR    | PIK3CG  | SOCS1    |        |
| AURKB    | CHEK2   | FANCL   | IKZF1  | MUTYH   | PIK3R1  | SOX10    |        |
| AXL      | CHUK    | FANCM   | IL7R   | MYC     | PIK3R2  | SOX2     |        |
| BACH1    | CIC     | FAT3    | INHBA  | MYCL1   | PMS2    | SPEN     |        |
| BAP1     | CRBN    | FBXW7   | IRF4   | MYCN    | PNRC1   | SPOP     |        |
| BARD1    | CREBBP  | FGF10   | IRS2   | MYD88   | PPP2R1A | SRC      |        |
| BCL2     | CRKL    | FGF12   | JAK1   | MYST3   | PRDM1   | STAG2    |        |
| BCL2L2   | CRLF2   | FGF14   | JAK2   | NBN     | PRKAR1A | STAT4    |        |
| BCL6     | CSF1R   | FGF19   | JAK3   | NCOR1   | PRKDC   | STK11    |        |
| BCOR     | CTCF    | FGF23   | JUN    | NF1     | PRSS8   | SUFU     |        |
| BCORL1   | CTNNA1  | FGF3    | KDM5A  | NF2     | PTCH1   | SYK      |        |
| BLM      | CTNNB1  | FGF4    | KDM5C  | NFE2L2  | PTEN    | TBX3     |        |
| BRAF     | CUL4A   | FGF6    | KDM6A  | NFKBIA  | PTPN11  | TET2     |        |
| BRCA1    | CUL4B   | FGF7    | KDR    | NKX2-1  | RAD50   | TGFBR2   |        |
| BRCA2    | CYP17A1 | FGFR1   | KEAP1  | NOTCH1  | RAD51   | TIPARP   |        |
| BRIP1    | DAXX    | FGFR2   | KIT    | NOTCH2  | RAD51B  | TNFAIP3  |        |
| BTG1     | DDR2    | FGFR3   | KLHL6  | NOTCH3  | RAD51C  | TNFRSF14 |        |
| BTK      | DIS3    | FGFR4   | KRAS   | NOTCH4  | RAD51D  | TOP1     |        |
| C17orf39 | DNMT3A  | FLT1    | LMO1   | NPM1    | RAD52   | TP53     |        |
| CARD11   | DOT1L   | FLT3    | LRP1B  | NRAS    | RAD54L  | TRRAP    |        |
| CASP8    | EGFR    | FLT4    | MAP2K1 | NSD1    | RAF1    | TSC1     |        |
| CBFB     | EMSY    | FOXL2   | MAP2K2 | NTRK1   | RARA    | TSC2     |        |
| CBL      | EP300   | GATA1   | MAP2K4 | NTRK2   | RB1     | TSHR     |        |

eTable 1. DNA sequencing target gene panel. All genes in the targeted panel are listed, in addition to 19 gene rearrangements and 2000 whole genome single nucleotide polymorphisms. MYST3 has been renamed to KAT6A and is listed as KAT6A for subsequent analyses.

<sup>a</sup>Frampton GM, Fichtenholtz A, Otto GA, et al. Development and validation of a clinical cancer genomic profiling test based on massively parallel DNA sequencing. Nat Biotechnol 2013;31:1023-31.

**eTable 2.Characteristics of the Entire Eligible BIG 1-98 Cohort and of the Analysis Population**

|                                                                             | Case-Cohort Analysis Population |              |            | Eligible Cohort |         |
|-----------------------------------------------------------------------------|---------------------------------|--------------|------------|-----------------|---------|
|                                                                             | N                               | Unweighted % | Weighted % | N               | %       |
| <i>N patients</i>                                                           | 538                             | 100          | 100        | 7329            | 100     |
| Age at randomization, median (IQR)                                          | 61                              | (56-68)      | 60 (55-67) | 61              | (56-67) |
| Tumor size >2cm                                                             | 235                             | 44           | 36         | 2629            | 36      |
| Lymph node-positive                                                         | 249                             | 46           | 63         | 4360            | 59      |
| Tumor grade                                                                 |                                 |              |            |                 |         |
| Unknown                                                                     | 2                               | 0            | --         | 165             | 2       |
| 1                                                                           | 74                              | 14           | 21         | 1638            | 22      |
| 2                                                                           | 293                             | 54           | 57         | 4124            | 56      |
| 3                                                                           | 169                             | 31           | 22         | 1402            | 19      |
| Luminal A/B-like status                                                     |                                 |              |            |                 |         |
| A-like                                                                      | 151                             | 28           | 39         | 2446            | 33      |
| B-like                                                                      | 374                             | 70           | 50         | 3108            | 42      |
| Unknown                                                                     | 13                              | 2            | 11         | 1775            | 24      |
| Adjuvant chemotherapy                                                       | 196                             | 36           | 26         | 1716            | 23      |
| Treatment assignment and randomization option (2- or 4-group randomization) |                                 |              |            |                 |         |
| Tamoxifen (2-group randomization)                                           | 55                              | 10           | 7          | 820             | 11      |
| Letrozole (2-group randomization)                                           | 39                              | 7            | 10         | 832             | 11      |
| Tamoxifen                                                                   | 108                             | 20           | 21         | 1422            | 19      |
| Letrozole                                                                   | 96                              | 18           | 21         | 1403            | 19      |
| Tamoxifen -> Letrozole                                                      | 125                             | 23           | 22         | 1446            | 20      |
| Letrozole -> Tamoxifen                                                      | 115                             | 21           | 19         | 1406            | 19      |
| Distant recurrences after 8.1 years median follow-up                        | 140                             | 26           | 10         | 841             | 11      |

Characteristics of the entire eligible BIG 1-98 cohort and of the analysis population, which was based on selection of all patients experiencing a distant recurrence and a stratified random sampling of the patients' not experiencing recurrence, for whom DNA was assessable. Unweighted (as sampled) and weighted (to correct for over-sampling of recurrences) percentages of the analysis population are provided. Luminal-like status was determined using the published St. Gallen 2013 consensus. Abbreviations: IQR, interquartile range.

**eTable 3.Somatic Driver Alterations and Weighted Frequencies**

| Short variants |               |                         | Copy number alterations |          |               |                         |
|----------------|---------------|-------------------------|-------------------------|----------|---------------|-------------------------|
| Gene           | Variant type  | Weighted proportion (%) | Gene                    | Cytoband | Variant type  | Weighted proportion (%) |
| <i>PIK3CA</i>  | short variant | 48.8                    | <i>CCND1</i>            | 11q13    | amplification | 17.2                    |
| <i>TP53</i>    | short variant | 15.3                    | <i>FGF19</i>            | 11q13    | amplification | 14.7                    |
| <i>MAP3K1</i>  | short variant | 14                      | <i>FGF3</i>             | 11q13    | amplification | 14.3                    |
| <i>GATA3</i>   | short variant | 12.2                    | <i>FGF4</i>             | 11q13    | amplification | 13.5                    |
| <i>CDH1</i>    | short variant | 12.2                    | <i>MYC</i>              | 8q24     | amplification | 11.3                    |
| <i>PTPN11</i>  | short variant | 6.5                     | <i>ZNF703</i>           | 8p11     | amplification | 9.3                     |
| <i>MAP2K4</i>  | short variant | 5.5                     | <i>FGFR1</i>            | 8p11     | amplification | 8.7                     |
| <i>SPEN</i>    | short variant | 5.2                     | <i>EMSY</i>             | 11q13    | amplification | 7.4                     |
| <i>PTEN</i>    | short variant | 4.8                     | <i>KAT6A</i>            | 8p11     | amplification | 5.1                     |
| <i>TBX3</i>    | short variant | 4.2                     | <i>ERBB2</i>            | 17q12    | amplification | 4.8                     |
| <i>CDKN1B</i>  | short variant | 4.1                     | <i>GNAS</i>             | 20q13    | amplification | 4.1                     |
| <i>AKT1</i>    | short variant | 4.1                     | <i>ZNF217</i>           | 20q13    | amplification | 4                       |
| <i>ARID1A</i>  | short variant | 3.8                     | <i>PRSS8</i>            | 16p11    | amplification | 2.5                     |
| <i>GNAS</i>    | short variant | 3.7                     | <i>AURKA</i>            | 20q13    | amplification | 2.4                     |
| <i>RUNX1</i>   | short variant | 3.2                     | <i>ARFRP1</i>           | 20q13    | amplification | 2.2                     |
| <i>ATM</i>     | short variant | 3.2                     | <i>MAP2K4</i>           | 17p12    | loss          | 2.1                     |
| <i>PBRM1</i>   | short variant | 3                       | <i>AKT3</i>             | 1q44     | amplification | 2                       |
| <i>NCOR1</i>   | short variant | 2.9                     | <i>MDM4</i>             | 1q32     | amplification | 1.9                     |
| <i>ABL1</i>    | short variant | 2.6                     | <i>IKBKE</i>            | 1q32     | amplification | 1.9                     |
| <i>BRCA2</i>   | short variant | 2.3                     | <i>PTEN</i>             | 10q23    | loss          | 1.8                     |
| <i>ERBB2</i>   | short variant | 2.1                     | <i>MDM2</i>             | 12q15    | amplification | 1.7                     |
| <i>SF3B1</i>   | short variant | 2                       | <i>BCL2L2</i>           | 14q11    | amplification | 1.7                     |
| <i>SETD2</i>   | short variant | 1.9                     | <i>IGF1R</i>            | 15q26    | amplification | 1.6                     |
| <i>MUTYH</i>   | short variant | 1.6                     | <i>MCL1</i>             | 1q21     | amplification | 1.5                     |
| <i>NF1</i>     | short variant | 1.4                     | <i>SRC</i>              | 20q11    | amplification | 1.1                     |
| <i>NOTCH1</i>  | short variant | 1.2                     | <i>RPTOR</i>            | 17q25    | amplification | 1.1                     |
| <i>PIK3R1</i>  | short variant | 1                       |                         |          |               |                         |
| <i>ATRX</i>    | short variant | 1                       |                         |          |               |                         |
| <i>RBI</i>     | short variant | 1                       |                         |          |               |                         |
| <i>BARD1</i>   | short variant | 1                       |                         |          |               |                         |

List of all driver alterations with weighted frequency of one percent or greater

**eTable 4. Association With Clinicopathologic Characteristics**

|                              | Age              |                 |         | Tumor size  |             |         | Nodal status   |                |         | Tumor grade |          |          |         | Ki-67 (%) |
|------------------------------|------------------|-----------------|---------|-------------|-------------|---------|----------------|----------------|---------|-------------|----------|----------|---------|-----------|
|                              | < 65 years (67%) | ≥65 years (32%) | P value | ≤2 cm (64%) | >2 cm (36%) | P value | Negative (63%) | Positive (37%) | P value | G1 (21%)    | G2 (57%) | G3 (22%) | P value | P value   |
| <i>PIK3CA</i> short variants | 49%              | 47%             | 0.70    | 48%         | 49%         | 0.78    | 51%            | 45%            | 0.26    | 67%         | 48%      | 33%      | <0.001* | 0.002*    |
| <i>GATA3</i> short variants  | 11%              | 14%             | 0.31    | 12%         | 12%         | 0.90    | 11%            | 14%            | 0.33    | 8%          | 13%      | 15%      | 0.28    | 0.17      |
| <i>TP53</i> short variants   | 16%              | 13%             | 0.38    | 14%         | 17%         | 0.42    | 15%            | 16%            | 0.59    | <1%         | 10%      | 41%      | <0.001* | < 0.001*  |
| <i>CDH1</i> short variants   | 11%              | 15%             | 0.36    | 10%         | 17%         | 0.04*   | 14%            | 9%             | 0.18    | 2%          | 18%      | 6%       | <0.001* | 0.10      |
| <i>MAP3K1</i> short variants | 14%              | 14%             | 0.9     | 18%         | 7%          | 0.002*  | 13%            | 16%            | 0.38    | 25%         | 12%      | 9%       | 0.02*   | 0.010*    |
| <i>PTPN11</i> short variants | 7%               | 6%              | 0.85    | 8%          | 3%          | 0.03*   | 7%             | 5%             | 0.46    | 12%         | 4%       | 8%       | 0.10    | 0.85      |
| <i>PTEN</i> short variants   | 4%               | 7%              | 0.13    | 6%          | 3%          | 0.25    | 4%             | 7%             | 0.24    | 2%          | 7%       | 2%       | 0.02*   | 0.019*    |
| <i>SPEN</i> short variants   | 6%               | 3%              | 0.02*   | 1%          | 12%         | <0.001* | 6%             | 3%             | 0.01*   | 17%         | 2%       | 3%       | <0.001* | 0.09      |
| <i>MAP2K4</i> short variants | 8%               | 1%              | <0.001* | 7%          | 3%          | 0.07    | 7%             | 3%             | 0.01*   | <1%         | 7%       | 6%       | 0.007*  | 0.87      |
| <i>ZNF217</i> amplification  | 4%               | 4%              | 0.97    | 4%          | 3%          | 0.54    | 4%             | 4%             | 0.93    | 0%          | 4%       | 8%       | 0.02*   | 0.07      |
| <i>GNAS</i> amplification    | 4%               | 5%              | 0.36    | 4%          | 4%          | 0.04    | 4%             | 4%             | 0.87    | 0%          | 4%       | 9%       | 0.006*  | 0.08      |
| <i>EMSY</i> amplification    | 7%               | 8%              | 0.87    | 7%          | 8%          | 0.90    | 8%             | 6%             | 0.28    | 2%          | 7%       | 13%      | 0.02*   | 0.003*    |
| <i>MYC</i> amplification     | 10%              | 13%             | 0.40    | 11%         | 13%         | 0.49    | 9%             | 15%            | 0.06    | 3%          | 9%       | 26%      | <0.001* | 0.001*    |
| <i>CCND1</i> amplification   | 16%              | 19%             | 0.56    | 18%         | 16%         | 0.60    | 16%            | 19%            | 0.52    | 10%         | 14%      | 30%      | 0.03*   | 0.001*    |
| <i>FGFR1</i> amplification   | 8%               | 10%             | 0.49    | 8%          | 11%         | 0.30    | 8%             | 11%            | 0.24    | 2%          | 7%       | 19%      | <0.001* | < 0.001*  |
| <i>KAT6A</i> amplification   | 4%               | 7%              | 0.25    | 6%          | 4%          | 0.42    | 4%             | 7%             | 0.13    | <1%         | 5%       | 9%       | 0.003*  | 0.007*    |
| <i>ZNF703</i> amplification  | 9%               | 11%             | 0.41    | 8%          | 11%         | 0.33    | 8%             | 12%            | 0.18    | 2%          | 7%       | 22%      | <0.001* | < 0.001*  |
| <i>FGF4</i> amplification    | 14%              | 13%             | 0.83    | 14%         | 13%         | 0.80    | 13%            | 14%            | 0.7     | 9%          | 11%      | 24%      | 0.07    | 0.001*    |
| <i>FGF3</i> amplification    | 14%              | 15%             | 0.92    | 15%         | 14%         | 0.79    | 13%            | 16%            | 0.48    | 9%          | 12%      | 25%      | 0.08    | 0.001*    |
| <i>FGF19</i> amplification   | 15%              | 15%             | 0.99    | 15%         | 15%         | 0.89    | 13%            | 18%            | 0.23    | 9%          | 13%      | 26%      | 0.07    | < 0.001*  |
| <i>ERBB2</i> amplification   | 5%               | 5%              | 0.83    | 4%          | 6%          | 0.50    | 4%             | 5%             | 0.62    | 0%          | 4%       | 12%      | <0.001* | 0.01*     |

Associations with driver alterations present in five percent or greater weighted cohort frequency are shown. The numbers displayed are weighted proportions with the exception of N, which is the absolute number of patients per subgroup, and P values. All P values are calculated using weighted Chi-squared tests with the exception of centrally assessed Ki-67 which is analysed as a continuous variable using a weighted t-test. \* P value < 0.05.

eTable 5. Pairwise Analysis – q Values

|                   | <i>PIK3CA</i> (m) | <i>GATA3</i> (m) | <i>TP53</i> (m) | <i>CDHI</i> (m) | <i>MAP3KI</i> (m) | <i>PTPN11</i> (m) | <i>PTEN</i> (m) | <i>SPEEN</i> (m) | <i>MAP2K4</i> (m) | <i>ZNF217</i> (A) | <i>GNAS</i> (A) | <i>EMSY</i> (A) | <i>MYC</i> (A) | <i>CCND1</i> (A) | <i>FGFR1</i> (A) | <i>KAT6A</i> (A) | <i>ZNF703</i> (A) | <i>FGF4</i> (A) | <i>FGF3</i> (A) | <i>FGF19</i> (A) | <i>ERBB2</i> (A) | <i>AKT1</i> (m) | <i>ERBB2</i> (m) |
|-------------------|-------------------|------------------|-----------------|-----------------|-------------------|-------------------|-----------------|------------------|-------------------|-------------------|-----------------|-----------------|----------------|------------------|------------------|------------------|-------------------|-----------------|-----------------|------------------|------------------|-----------------|------------------|
| <i>PIK3CA</i> (m) |                   | 0.171            | 0.786           | 0.806           | 0.081             | 0.069             | 0.167           | 0.995            | 1                 | 0.828             | 0.529           | 1               | 0.008          | 0.077            | 0.5              | 0.152            | 0.209             | 0.12            | 0.138           | 0.036            | 0.034            | 0.002           | 0.856            |
| <i>GATA3</i> (m)  | 0.171             |                  | 0.064           | 0.343           | 0.068             | 0.786             | 1               | 0.543            | 1                 | 0.524             | 0.572           | 0.423           | 1              | 0.825            | 0.524            | 0.373            | 0.786             | 1               | 0.736           | 0.856            | 1                | 0.824           | 0.932            |
| <i>TP53</i> (m)   | 0.786             | 0.064            |                 | 0               | 0.002             | 0.903             | 0.856           | 0.5              | 0.319             | 0.001             | 0.076           | 0.645           | 0.004          | 0.856            | 0.007            | 0.811            | 0.006             | 0.828           | 0.83            | 1                | 0.033            | 1               | 0.806            |
| <i>CDHI</i> (m)   | 0.806             | 0.343            | 0               |                 | 0.308             | 0.307             | 0.975           | 1                |                   |                   | 0.524           | 0.518           | 0.068          | 1                | 0.822            | 0.308            | 0.929             | 0.796           | 0.796           | 0.856            | 0.387            | 1               | 0.739            |
| <i>MAP3KI</i> (m) | 0.081             | 0.068            | 0.002           | 0.308           |                   | 0.987             | 1               | 1                |                   |                   | 0.524           | 0.373           | 1              | 0.171            | 0.088            | 1                | 0.051             | 0.218           | 0.13            | 0.097            | 0.387            | 0.97            | 0.932            |
| <i>PTPN11</i> (m) | 0.069             | 0.786            | 0.903           | 0.307           | 0.987             |                   | 1               | 0.585            | 0.283             | 1                 | 0.934           | 0.975           | 1              | 0.338            | 0.987            |                  | 0.987             | 0.18            | 0.212           | 0.307            | 1                |                 |                  |
| <i>PTEN</i> (m)   | 0.167             | 1                | 0.856           | 0.975           | 1                 | 1                 |                 | 0.835            | 0.856             | 1                 | 1               | 0.934           | 0.736          | 0.856            | 0.662            | 1                | 0.83              | 0.987           | 0.856           | 1                | 1                |                 | 0.828            |
| <i>SPEEN</i> (m)  | 0.995             | 0.543            | 0.5             | 1               | 1                 | 0.585             | 0.835           |                  |                   | 0.828             | 0.496           | 1               | 0.796          | 0.97             | 1                | 1                | 0.932             | 1               | 1               | 1                | 1                | 0.796           |                  |
| <i>MAP2K4</i> (m) | 1                 | 1                | 0.319           |                 |                   | 0.283             | 0.856           |                  |                   |                   |                 |                 | 1              | 0.5              | 0.751            | 1                | 0.786             | 0.796           | 0.645           | 0.645            | 0.222            | 0.806           |                  |
| <i>ZNF217</i> (A) | 0.828             | 0.524            | 0.001           |                 |                   | 1                 | 1               | 0.828            |                   |                   | 0               | 0.18            | 0.087          | 1                | 0.08             | 1                | 0.116             | 0.736           | 0.582           | 0.987            | 0.069            | 0.584           |                  |
| <i>GNAS</i> (A)   | 0.529             | 0.572            | 0.076           | 0.524           | 0.524             | 0.934             | 1               | 0.496            |                   | 0                 |                 | 0.233           | 0.007          | 0.373            | 1                |                  | 0.726             | 0.756           | 0.856           | 0.222            | 0.033            | 0.649           |                  |
| <i>EMSY</i> (A)   | 1                 | 0.423            | 0.645           | 0.518           | 0.373             | 0.975             | 0.934           | 1                |                   | 0.18              | 0.233           |                 | 1              | 0                | 0.034            | 0.097            | 0.036             | 0               | 0               | 0                | 1                | 1               | 1                |
| <i>MYC</i> (A)    | 0.008             | 1                | 0.004           | 0.068           | 1                 | 1                 | 0.736           | 0.796            | 1                 | 0.087             | 0.007           | 1               |                | 0.387            | 0.034            | 0.006            | 0                 | 0.796           | 0.736           | 0.529            | 0                |                 | 0.932            |
| <i>CCND1</i> (A)  | 0.077             | 0.825            | 0.856           | 1               | 0.171             | 0.338             | 0.856           | 0.97             | 0.5               | 1                 | 0.373           | 0               | 0.387          |                  | 0.097            | 0.19             | 0.068             | 0               | 0               | 0                | 0.529            | 0.856           | 0.645            |
| <i>FGFR1</i> (A)  | 0.5               | 0.524            | 0.007           | 0.822           | 0.088             | 0.987             | 0.662           | 1                | 0.751             | 0.08              | 1               | 0.034           | 0.034          | 0.097            |                  | 0                | 0                 | 0.088           | 0.071           | 0.058            | 0.222            | 0.796           |                  |
| <i>KAT6A</i> (A)  | 0.152             | 0.373            | 0.811           | 0.308           | 1                 |                   | 1               | 1                | 1                 | 1                 |                 | 0.097           | 0.006          | 0.19             | 0                |                  | 0                 | 0.379           | 0.298           | 0.319            | 0.796            | 0.726           |                  |
| <i>ZNF703</i> (A) | 0.209             | 0.786            | 0.006           | 0.929           | 0.051             | 0.987             | 0.83            | 0.932            | 0.786             | 0.116             | 0.726           | 0.036           | 0              | 0.068            | 0                | 0                |                   | 0.053           | 0.042           | 0.034            | 0.281            | 0.802           |                  |
| <i>FGF4</i> (A)   | 0.12              | 1                | 0.828           | 0.796           | 0.218             | 0.18              | 0.987           | 1                | 0.796             | 0.736             | 0.756           | 0               | 0.796          | 0                | 0.088            | 0.379            | 0.053             |                 |                 | 0                | 0.222            | 1               | 0.796            |
| <i>FGF3</i> (A)   | 0.138             | 0.736            | 0.83            | 0.796           | 0.13              | 0.212             | 0.856           | 1                | 0.645             | 0.582             | 0.856           | 0               | 0.736          | 0                | 0.071            | 0.298            | 0.042             |                 |                 | 0                | 0.248            | 1               | 0.796            |
| <i>FGF19</i> (A)  | 0.036             | 0.856            | 1               | 0.856           | 0.097             | 0.307             | 1               | 1                | 0.645             | 0.987             | 0.222           | 0               | 0.529          | 0                | 0.058            | 0.319            | 0.034             | 0               | 0               |                  | 0.373            | 0.987           | 0.796            |
| <i>ERBB2</i> (A)  | 0.034             | 1                | 0.033           | 0.387           | 0.387             | 1                 | 1               | 1                | 0.222             | 0.069             | 0.033           | 1               | 0              | 0.529            | 0.222            | 0.796            | 0.281             | 0.222           | 0.248           | 0.373            |                  |                 | 0.856            |
| <i>AKT1</i> (m)   | 0.002             | 0.824            | 1               | 1               | 0.97              |                   |                 | 0.796            | 0.806             | 0.584             | 0.649           | 1               |                | 0.856            | 0.796            |                  | 0.802             | 1               | 1               | 0.987            |                  |                 |                  |
| <i>ERBB2</i> (m)  | 0.856             | 0.932            | 0.806           | 0.739           | 0.932             |                   | 0.828           |                  |                   |                   |                 | 1               | 0.932          | 0.645            |                  |                  |                   | 0.796           | 0.796           | 0.796            | 0.856            |                 |                  |

Fisher's exact test between somatic alteration pairs was applied to alterations with a weighted population frequency of five percent or greater, in addition to breast cancer alterations of interest (*ERBB2* and *AKT1* mutations). False discovery rate adjusted p values (q val) are shown. Abbreviations: m, mutation; A, amplification.

**eTable 6. Prognostic Associations by Affected *PIK3CA* Protein Domain**

| <b><i>PIK3CA</i> mutation status</b> | <b>Number</b> | <b>Weighted proportion</b> | <b>Prognostic association HR (95% CI)</b> | <b>p-value</b> |
|--------------------------------------|---------------|----------------------------|-------------------------------------------|----------------|
| Kinase domain mutation               | 103           | 19%                        | 0.57 (0.33 – 1.00)                        | 0.17           |
| Helical domain mutation              | 103           | 20%                        | 0.63 (0.38 – 1.04)                        |                |
| Kinase and helical domain mutation   | 9             | 1%                         | 0.48 (0.06 – 3.87)                        |                |
| Other domain mutation                | 33            | 8%                         | 0.44 (0.18 – 1.07)                        |                |
| Wild type                            | 290           | 51%                        |                                           |                |

The “kinase and helical domain mutations” subgroup refers to tumors harbouring both kinase and helical domain *PIK3CA* mutations. Numbers for this analysis include patients randomized to monotherapy and sequential endocrine treatment arms. Prognostic association is calculated from weighted univariate Cox Proportional Hazard models stratified by treatment arm and is mutational status versus wild type. Abbreviations: HR, hazard ratio; 95% CI, 95% confidence interval.

**eTable 7. Predictive Associations by Affected *PIK3CA* Protein Domain**

| <b>Analysis by individual protein domains</b>                    |               |                            |                                               |                            |
|------------------------------------------------------------------|---------------|----------------------------|-----------------------------------------------|----------------------------|
| <b><i>PIK3CA</i> mutation status</b>                             | <b>Number</b> | <b>Weighted proportion</b> | <b>Letrozole versus tamoxifen HR (95% CI)</b> | <b>Interaction P value</b> |
| Kinase domain mutation                                           | 45            | 16%                        | 0.32 (0.05 – 1.88)                            | 0.01                       |
| Helical domain mutation                                          | 63            | 22%                        | 0.13 (0.04 – 0.44)                            |                            |
| Kinase and helical domain mutation                               | 6             | 2%                         | 1.03 (0.12 – 9.14)                            |                            |
| Other domain mutation                                            | 20            | 10%                        | 8.56 (0.75 – 97.7)                            |                            |
| Wild type                                                        | 164           | 50%                        | 0.94 (0.46 – 1.90)                            |                            |
| <b>Analysis by combined kinase and/or helical protein domain</b> |               |                            |                                               |                            |
| Kinase and/or helical domain mutation-positive                   | 114           | 40%                        | 0.18 (0.06 – 0.50)                            | 0.002                      |
| Kinase and/or helical domain mutation-negative                   | 184           | 60%                        | 1.26 (0.65 – 2.45)                            |                            |

Treatment associations by affected individual *PIK3CA* protein domains and in combined analysis. Numbers for this analysis include only patients randomized to monotherapy treatment arms. Letrozole versus tamoxifen calculations are from weighted Cox Proportional Hazard models using letrozole and tamoxifen monotherapy arms only. P values are a test of interaction between monotherapy treatment and mutation status. The Kinase and/or helical domain mutation–negative group combines wild type and other domain mutation subgroups. Abbreviations: HR, hazard ratio; 95% CI, 95% confidence interval.



**eTable 8. Predictive Associations by Affected *PIK3CA* Mutation Hotspot**

| <b>Analysis by affected <i>PIK3CA</i> mutation hotspot</b>                |                          |               |                            |                                               |                            |
|---------------------------------------------------------------------------|--------------------------|---------------|----------------------------|-----------------------------------------------|----------------------------|
| <b><i>PIK3CA</i> mutation hotspot</b>                                     | <b>Functional domain</b> | <b>Number</b> | <b>Weighted proportion</b> | <b>Letrozole versus tamoxifen HR (95% CI)</b> | <b>Interaction P value</b> |
| N345                                                                      | C2                       | 10            | 7%                         | Insufficient numbers                          |                            |
| C420                                                                      | C2                       | 3             | <1%                        | Insufficient numbers                          |                            |
| E542                                                                      | helical                  | 25            | 6%                         | 0.26 (0.05 – 1.35)                            |                            |
| E545                                                                      | helical                  | 34            | 15%                        | 0.06 (<0.01 – 0.80)                           |                            |
| Q546                                                                      | helical                  | 4             | <1%                        | Insufficient numbers                          |                            |
| H1047                                                                     | kinase                   | 43            | 14%                        | 0.30 (0.05 – 1.82)                            |                            |
| Non-hotspot mutation                                                      |                          | 8             | 3%                         | Insufficient numbers                          |                            |
| >1 hotspot per tumor                                                      |                          | 7             | 3%                         | Insufficient numbers                          |                            |
| Wild type                                                                 |                          | 164           | 50%                        | 0.86 (0.41 – 1.80)                            |                            |
| <b>Analysis by combinations of common <i>PIK3CA</i> mutation hotspots</b> |                          |               |                            |                                               |                            |
| E542, E545, H1047 mutation-positive                                       |                          | 102           | 36%                        | 0.17 (0.05 – 0.59)                            | 0.009                      |
| E542, E545, H1047 mutation-negative                                       |                          | 196           | 64%                        | 1.13 (0.53 – 2.41)                            |                            |

Treatment associations by affected *PIK3CA* mutation hotspot and in combined analysis of frequent mutation hotspots. Tumors were categorized into specific hotspot mutation subgroups if only one hotspot mutation was present. If more than one hotspot was present the tumor was categorized into the “>1 hotspot per tumor” subgroup. Numbers for this analysis include only patients randomized to monotherapy treatment arms. Letrozole versus tamoxifen calculations are from weighted Cox Proportional Hazard models using letrozole and tamoxifen monotherapy arms only. Interaction P values are a test of interaction between monotherapy treatment and mutation status. Exploratory Cox analysis of letrozole vs tamoxifen for the combination of infrequent hotspot mutations (N345+C420+Q546+>1 hotspot per tumor) was underpowered and is not shown (HR 4.5; 95%CI 0.40 – 51.36). Abbreviations: HR, hazard ratio; 95% CI, 95% confidence interval.

**eTable 9. Treatment Interaction With *PIK3CA* Mutation Status in a Multivariate Cox Proportional Hazards Model**

|                                     | <b>HR (95% CI)</b> | <b>P value</b> |
|-------------------------------------|--------------------|----------------|
| Age (<65 vs ≥65 years)              | 1.37 (0.74 – 2.53) | 0.31           |
| Tumor size (≤ 2 cm vs > 2 cm)       | 1.54 (0.81 – 2.90) | 0.19           |
| Nodal status (positive vs negative) | 2.80 (1.43 – 5.48) | < 0.01         |
| Ki-67 level (%) (continuous)        | 1.03 (1.01 - 1.05) | < 0.01         |
|                                     |                    |                |
| Letrozole vs tamoxifen:             |                    | 0.03*          |
| <i>PIK3CA</i> mutation status       |                    |                |
| helical and/or kinase mutation      | 0.27 (0.09 – 0.77) |                |
| <i>Wild type or other mutation</i>  | 1.15 (0.55-2.41)   |                |

Weighted multivariate Cox proportional hazard analysis for distant recurrence-free interval with treatment interaction. All patients in the analysis cohort are included in the model. Ki-67 level was analysed as a continuous variable. Only patients treated with tamoxifen or letrozole monotherapy were included for treatment analyses. \* Test for interaction between monotherapy treatment and *PIK3CA* mutation status. Abbreviations: HR, hazard ratio; 95% CI, 95% confidence interval.

**eFigure 1. Coexistent Alterations in Tumors With a *PIK3CA* Mutation**

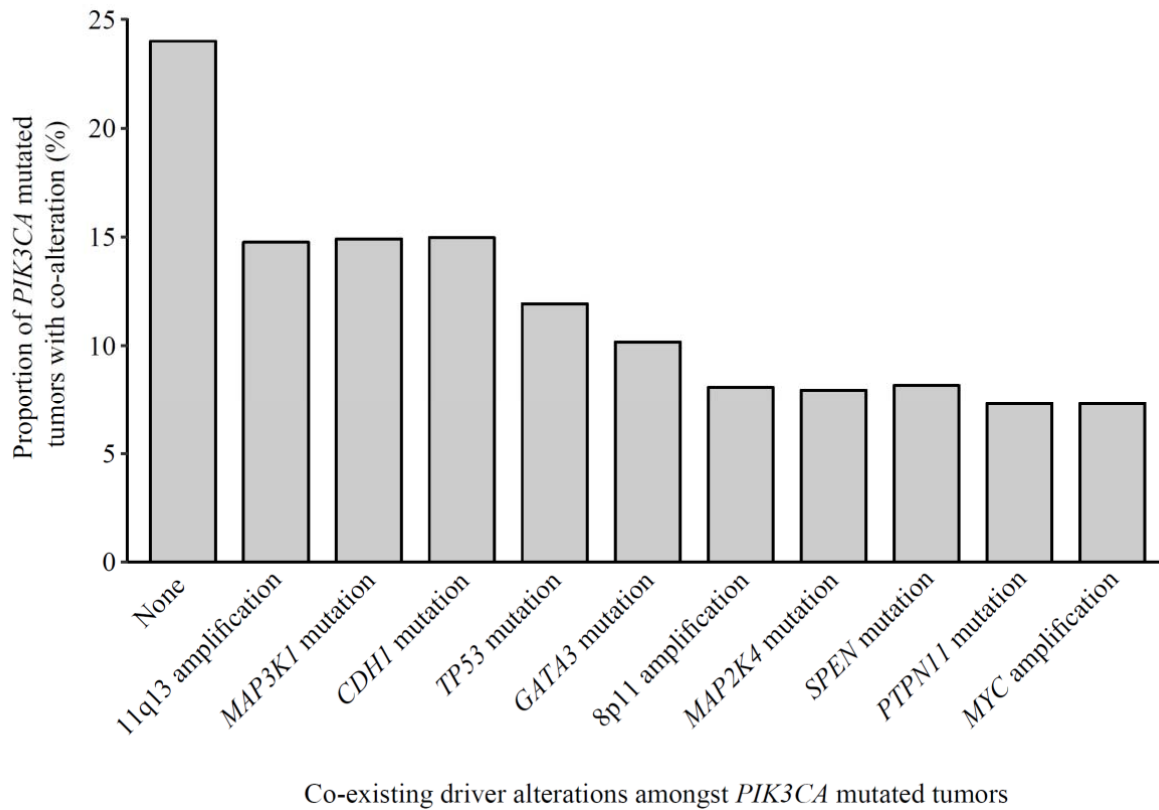

Weighted proportion of co-existent driver alterations in tumors that harbour a *PIK3CA* mutation.

**eFigure 2. *PIK3CA* Mutations and Affected Protein Domains**

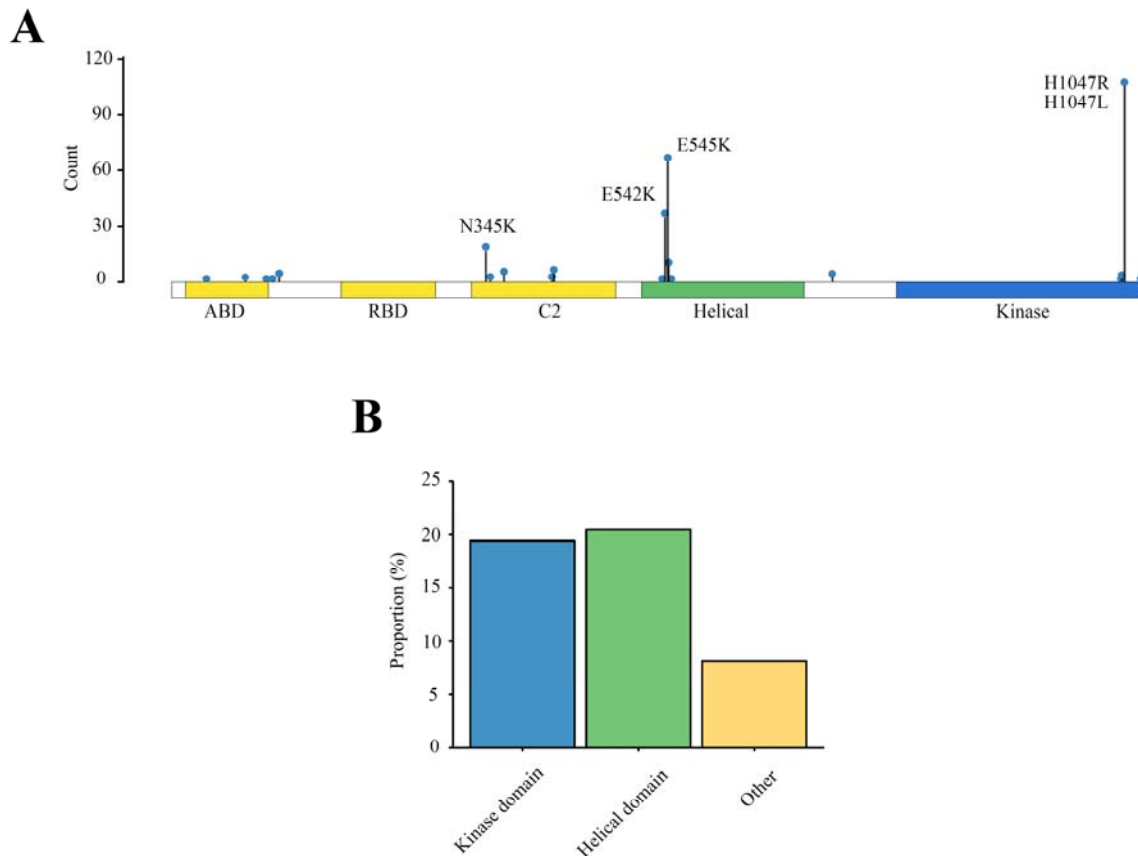

Panel A shows the distribution of *PIK3CA* mutations by affected protein domain. Count is the number of patients with a mutation at the corresponding amino acid position. Panel B shows the weighted proportions by affected protein domain, out of the whole cohort. As described in the methods, *PIK3CA* mutations were annotated as kinase domain mutation, helical domain mutation, or other mutation if it did not affect either the kinase or helical domain. Abbreviations: ABD, adaptor-binding domain; RBD, Ras-binding domain.

**eFigure 3. Coalterations by Affected *PIK3CA* Protein Domain**

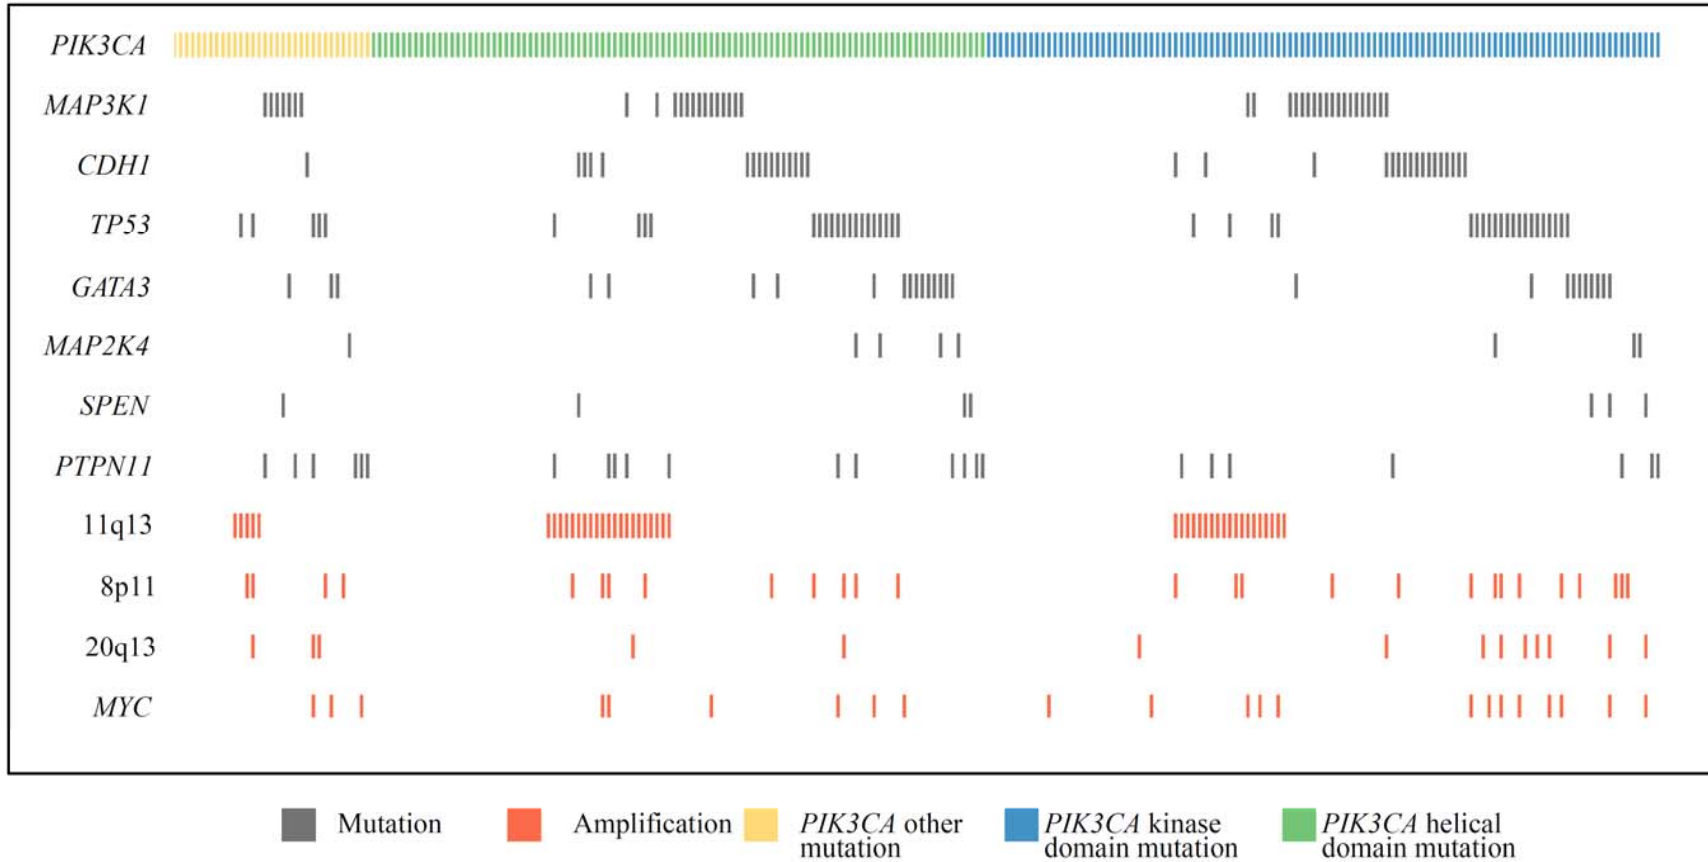

11q13 amplifications include *CCND1*, *EMSY*, *FGF3*, *FGF4*, *FGF19*; 8p11 amplifications include *FGFR1*, *ZNF703*, *KAT6A*; 20q13 amplifications include *GNAS*, *ZNF217*.

**eFigure 4. Coalteration Frequencies by *PIK3CA* Genotype**

**A *PIK3CA* wild type vs *PIK3CA* mutated**

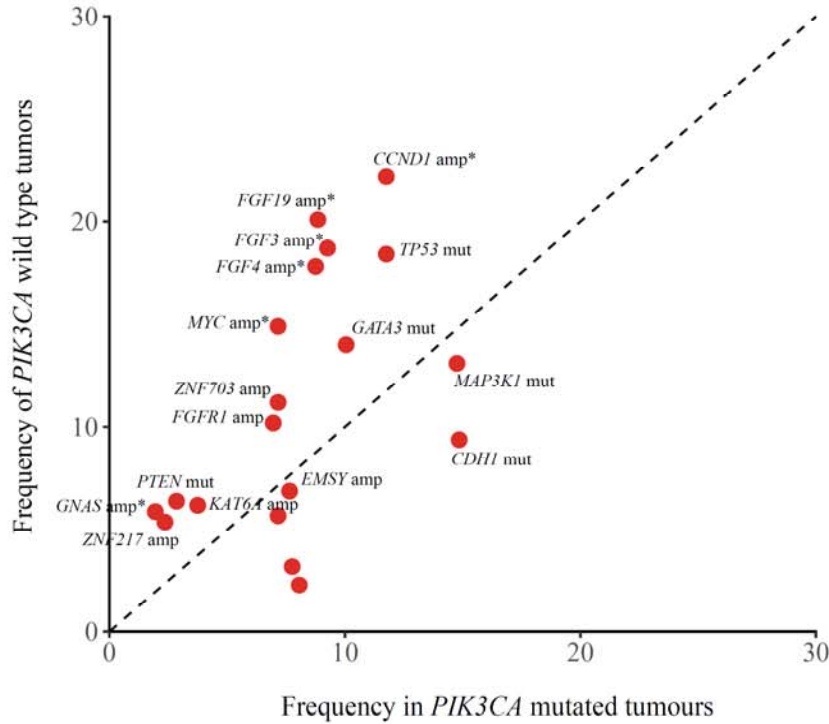

**B *PIK3CA* helical/kinase domain mutation-negative vs positive**

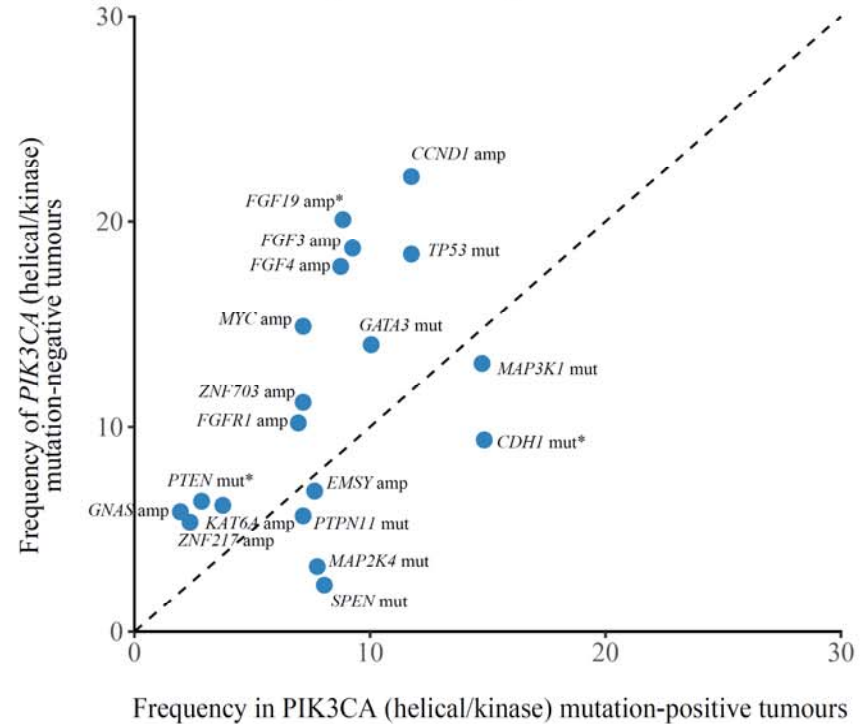

Weighted frequencies of co-existing driver alterations by *PIK3CA* genotype in A (*PIK3CA* wild type versus *PIK3CA* mutated) and B (*PIK3CA* kinase/helical domain mutation-negative vs positive). \* P value of < 0.05 in weighted Chi-squared tests.

**A - Ki-67 levels in all tumors by driver alteration**

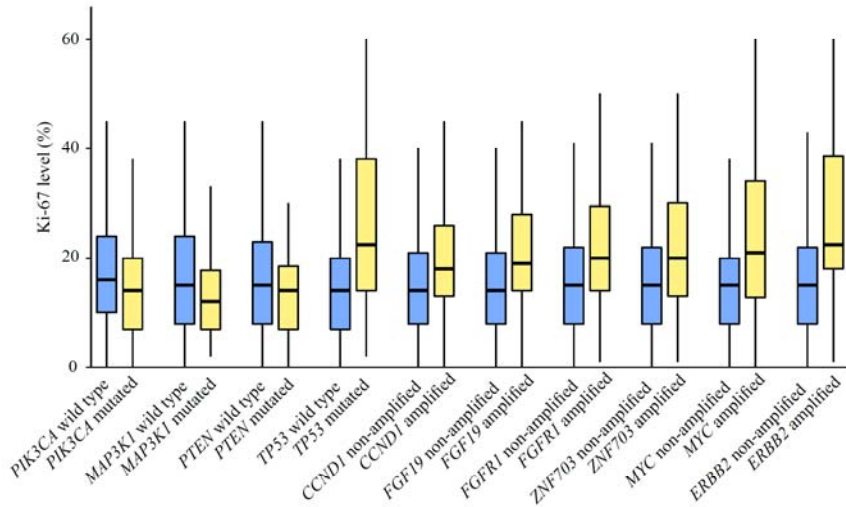

**B - Ki-67 levels in tumors with a PIK3CA mutation by co-existent alteration**

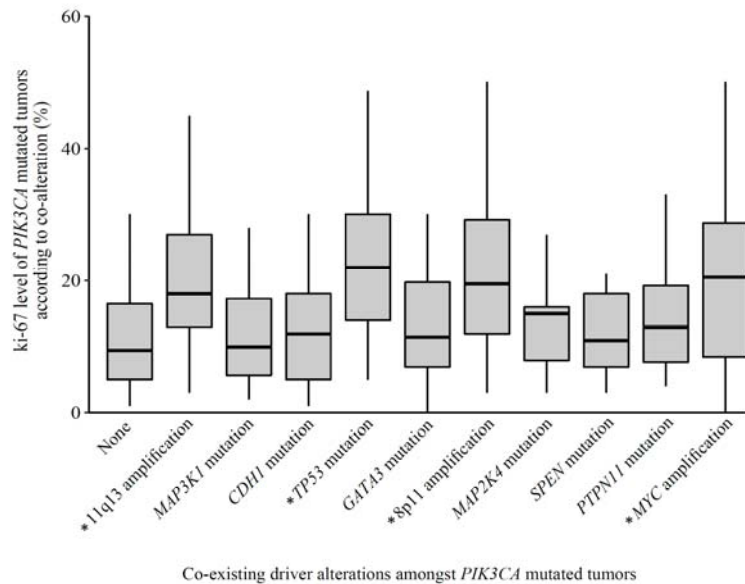

**eFigure 5. Associations With Ki-67 (%) Levels**

Panel A shows the association of driver alterations with centrally-assessed ki-67 level (%). All displayed boxplots of mutation versus wild type or amplification versus non-amplification are statistically significant (P value < 0.05 by weighted t-test) as shown in Table SR3. Panel B demonstrates the diversity in centrally assessed ki-67 levels (%) based on the presence or absence of co-existent driver alterations in tumors that harbour a *PIK3CA* mutation. Focal gene amplifications on chromosomes 11q13 and 8p11 are described in the text. \* P value < 0.05 by weighted t-test versus subgroup of patients with tumors that harbour a *PIK3CA* mutation and no-coalteration (“None”).

**eFigure 6. Association of Pathological Characteristics by Affected *PIK3CA* Protein Domain**

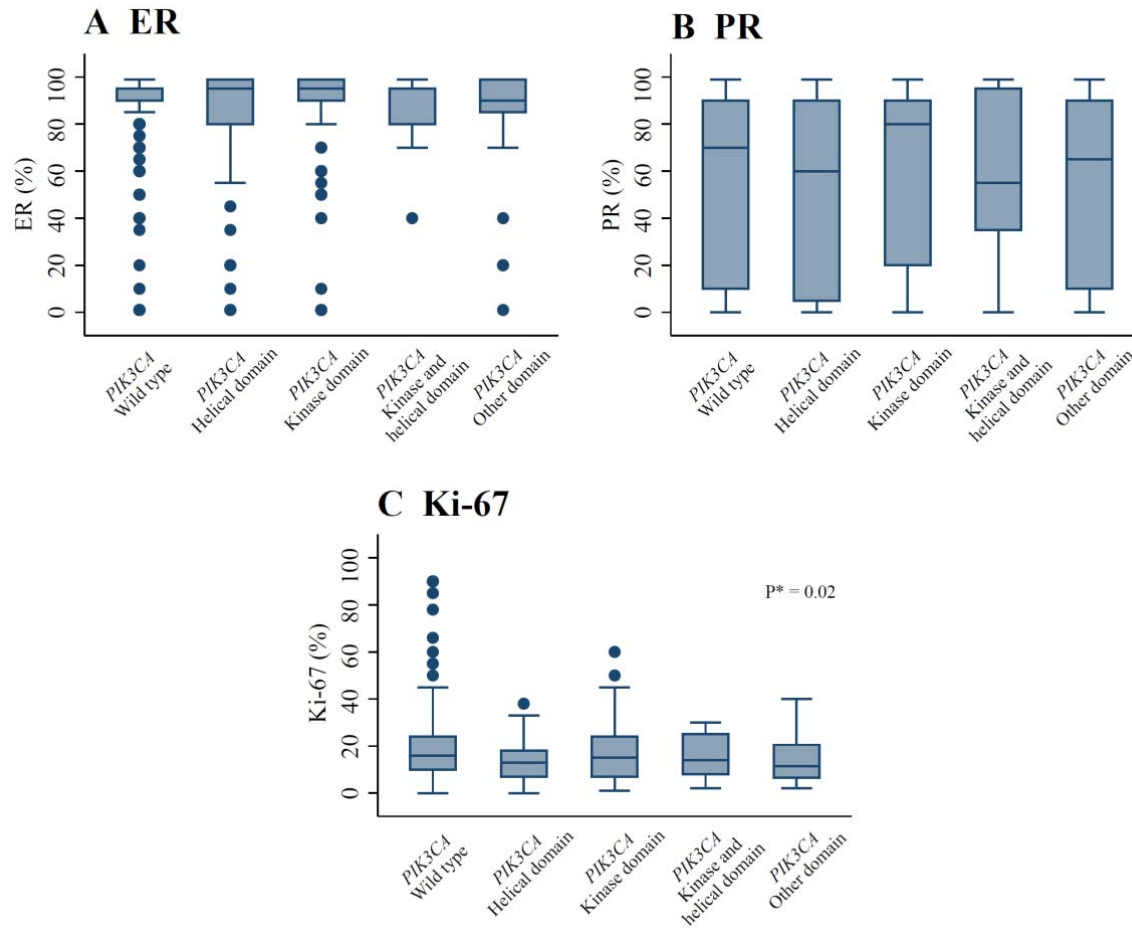

Boxplots demonstrating estrogen receptor expression (Panel A), progesterone receptor expression (Panel B), and centrally assessed ki-67 (Panel C) by affected *PIK3CA* protein domain or wild type. The *PIK3CA* Kinase and helical domain group refers to patients with both a kinase and helical domain mutation. There were no statistically significant differences between the shown groups using a Kruskal-Wallis test with a P value of  $< 0.05$  for significance, with the exception of the P value shown. Abbreviations: ER, estrogen receptor; PR, progesterone receptor.



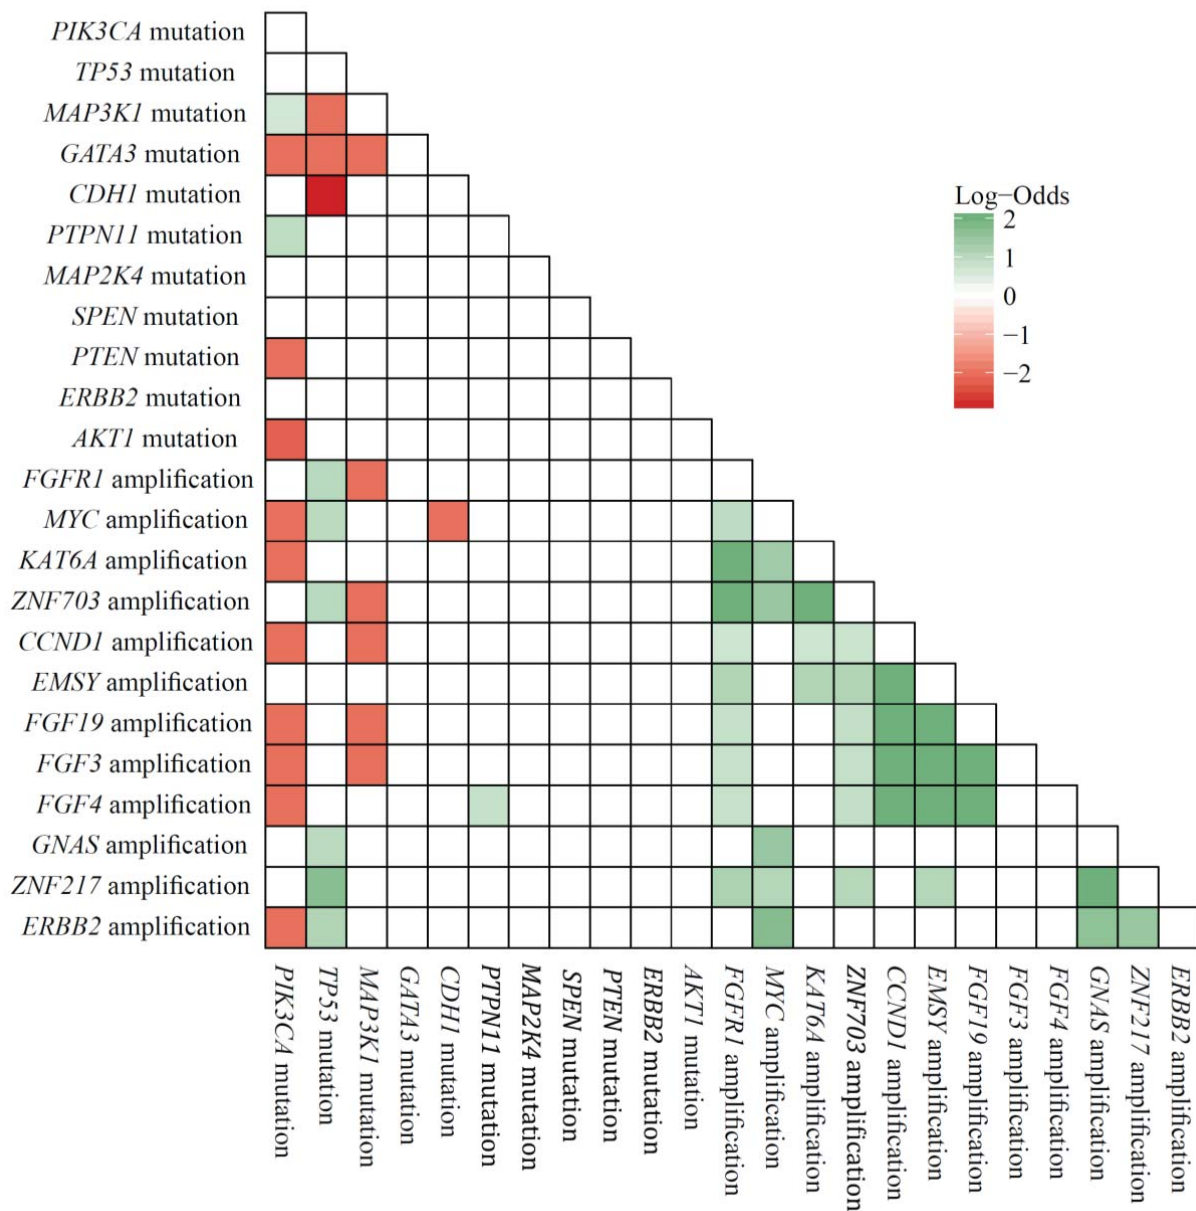

**Figure 7. Pairwise Analysis**

Fisher’s exact test between somatic alteration pairs was applied to alterations with a weighted population frequency of 5% or greater, in addition to breast cancer alterations of interest (*ERBB2* and *AKT1* mutations), generating odds ratios and p-values. Only log-odds with a false discovery rate of  $< 0.2$  are displayed. Log-odds are capped (2, if  $>2$ ; -2 if  $< -2$ ) and shown by color with green indicating an association with co-existence, and red indicating an association with mutual exclusivity.

**eFigure 8. Prognostic Association of Frequent Amplicons With DRFI**

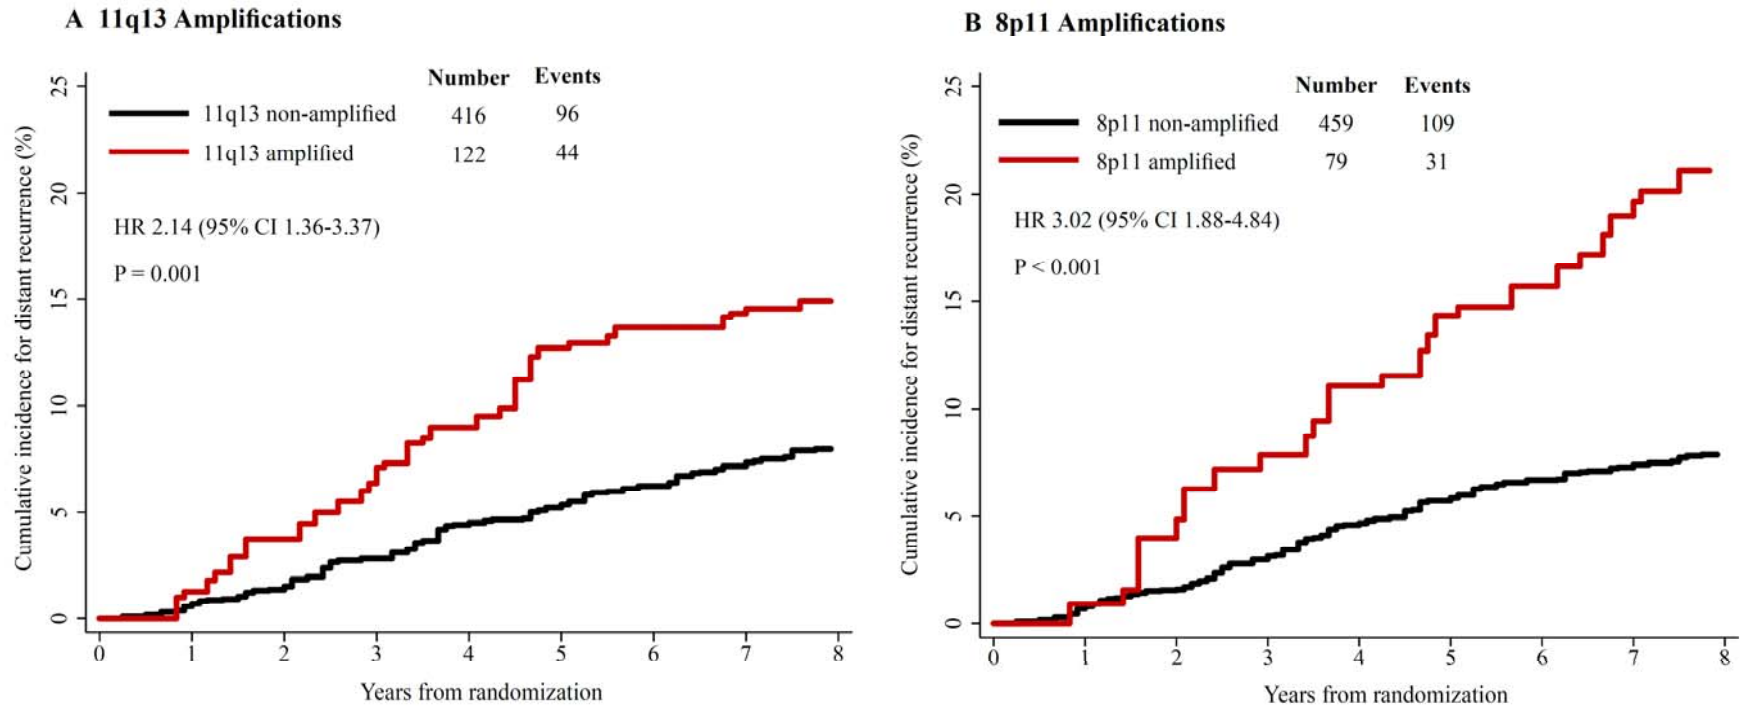

Weighted cumulative incidence curves are shown for the distant recurrence (%) by 11q13 (*CCND1*, *EMSY*, *FGF3*, *FGF4*, *FGF19*) amplification status (Panel A) and by 8p11 (*FGFR1*, *KAT6A*, *ZNF703*) amplification status (Panel B). Hazard ratio, 95% confidence intervals and P values attained using weighted Cox Proportional Hazard models stratified by treatment arm. Abbreviations: HR, hazard ratio; 95% CI, 95% confidence interval.

eFigure 9. STEPP Analysis by *PIK3CA* Mutation Status

**A STEPP analysis:**

**Kinase/helical domain *PIK3CA* mutation-positive**

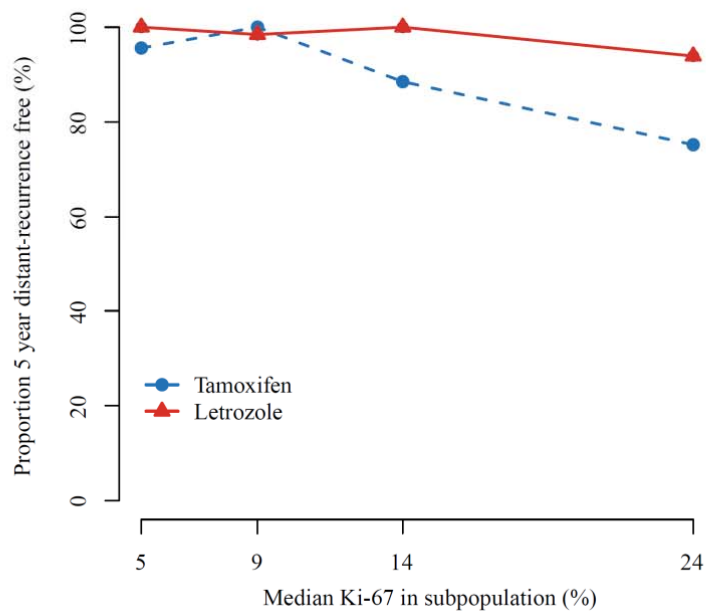

**B STEPP analysis:**

**Kinase/helical domain *PIK3CA* mutation-negative**

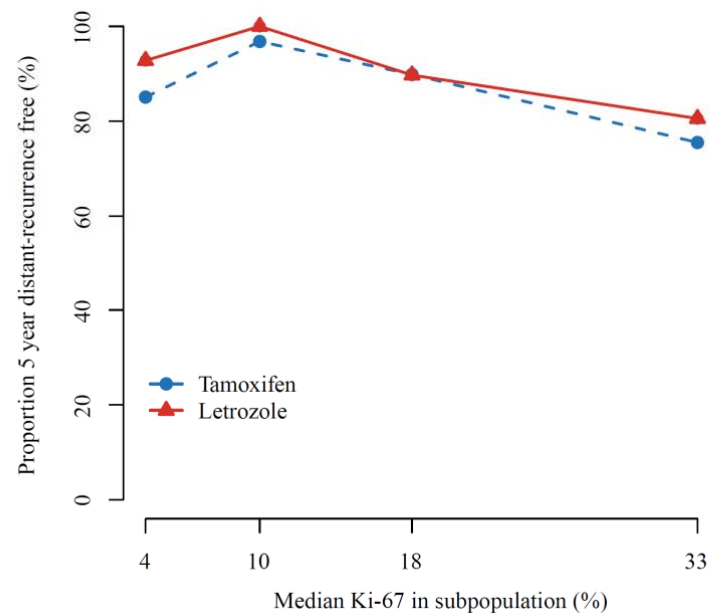

Panels A and B demonstrate the STEPP analysis of the effect of treatment with letrozole or tamoxifen on the weighted proportion of patients who are distant-recurrence free at 5 years according to overlapping subpopulations defined by median Ki-67 levels (%) by *PIK3CA* mutation status. Abbreviations: STEPP, Subpopulation Treatment Effect Pattern.
